## 1 **Computational Tool for Ensemble Averaging of Single-Molecule Data**

2  
3 Thomas Blackwell<sup>1</sup>, W. Tom Stump<sup>1</sup>, Sarah R. Clippinger<sup>1</sup>, Michael J. Greenberg<sup>1,\*</sup>

4  
5 <sup>1</sup>Department of Biochemistry and Molecular Biophysics, Washington University School of  
6 Medicine, St. Louis, MO, 63110, USA

7  
8  
9 \*Corresponding author:

10  
11 Michael J. Greenberg  
12 Department of Biochemistry and Molecular Biophysics  
13 Washington University School of Medicine  
14 660 S. Euclid Ave., Campus Box 8231  
15 St. Louis, MO 63110  
16 Phone: (314) 362-8670  
17 Email: [greenberg@wustl.edu](mailto:greenberg@wustl.edu)

18  
19 **Keywords:** single molecule, myosin, ensemble average, change point algorithm,  
20 MATLAB

21 **Abstract**

22 Molecular motors couple chemical transitions to conformational changes that perform  
23 mechanical work in a wide variety of biological processes. Disruption of this coupling can  
24 lead to diseases, and therefore there is a need to accurately measure mechanochemical  
25 coupling in motors in both health and disease. Optical tweezers, with nanometer spatial  
26 and millisecond temporal resolution, have provided valuable insights into these  
27 processes. However, fluctuations due to Brownian motion can make it difficult to precisely  
28 resolve these conformational changes. One powerful analysis technique that has  
29 improved our ability to accurately measure mechanochemical coupling in motor proteins  
30 is ensemble averaging of individual trajectories. Here, we present a user-friendly  
31 computational tool, Software for Precise Analysis of Single Molecules (SPASM), for  
32 generating ensemble averages of single-molecule data. This tool utilizes several  
33 conceptual advances, including optimized procedures for identifying single-molecule  
34 interactions and the implementation of a change point algorithm, to more precisely resolve  
35 molecular transitions. Using both simulated and experimental data, we demonstrate that  
36 these advances allow for accurate determination of the mechanics and kinetics of the  
37 myosin working stroke with a smaller set of data. Importantly, we provide our open source  
38 MATLAB-based program with a graphical user interface that enables others to readily  
39 apply these advances to the analysis of their own data.

40

41 **Statement of Significance**

42 Single molecule optical trapping experiments have given unprecedented insights into the  
43 mechanisms of molecular machines. Analysis of these experiments is often challenging  
44 because Brownian motion-induced fluctuations introduce noise that can obscure  
45 molecular motions. A powerful technique for analyzing these noisy traces is ensemble  
46 averaging of individual binding interactions, which can uncover information about the  
47 mechanics and kinetics of molecular motions that are typically obscured by Brownian  
48 motion. Here, we provide an open source, easy-to-use computational tool, SPASM, with  
49 a graphical user interface for ensemble averaging of single molecule data. This  
50 computational tool utilizes several conceptual advances that significantly improve the  
51 accuracy and resolution of ensemble averages, enabling the generation of high-resolution  
52 averages from a smaller number of binding interactions.

53

## 54 **Introduction**

55           Molecular motors generate force and movement in a wide array of cellular  
56 processes, including muscle contraction, packaging of DNA into viral capsids, intracellular  
57 transport, DNA damage repair, and cell motility. These motors have complex  
58 mechanochemical cycles where chemical transitions are coupled to conformational  
59 changes in the protein structure that generate mechanical work. The kinetics and  
60 mechanics of these transitions are tuned to the specific molecular role of the motor in the  
61 cell, and subtle changes in these properties can lead to an array of diseases (1).  
62 Therefore, there is a need for experimental and computational techniques for probing  
63 these relationships.

64           Single-molecule optical trapping techniques, with nanometer spatial and  
65 millisecond temporal resolution, have proven to be powerful tools for studying the  
66 mechanochemical coupling in motors. One widely used optical trapping technique is the  
67 three-bead assay (**Fig. 1A**) (2, 3). In this assay, two beads are held in place by dual-beam  
68 optical tweezers. The motor's track (e.g., actin) is strung between these beads and then  
69 lowered onto a third, surface-bound bead. This third bead is sparsely coated with motor  
70 molecules (e.g., myosin), such that only a single motor interacts with the track at any  
71 given time. The positions of the two optically trapped beads are monitored to study the  
72 interactions between the motor and the track (**Fig. 1B**), where motor binding to the track  
73 causes both displacement of the beads as well as a reduction in the bead variance. This  
74 assay has been applied to study several motor and non-motor systems, including dynein  
75 (4), the lac repressor (5), kinesins (6), and several myosin isoforms (7-15).

76           Analysis of the individual time-dependent trajectories of motor-induced  
77 displacements in the bead positions can provide information about both the mechanics  
78 and the kinetics of the motor's mechanochemical cycle. However, it can be difficult to  
79 resolve details of these trajectories, as the amplitude of Brownian motion-induced  
80 fluctuations in the bead position are frequently larger than the size of motor-induced  
81 displacements. One powerful method for extracting high spatial and temporal resolution  
82 information from noisy traces is post-synchronization ensemble averaging (13, 16). In this  
83 method, trajectories from multiple individual binding interactions are aligned and then  
84 averaged together, thereby increasing the signal-to-noise ratio. This technique has been  
85 applied to successfully identify substeps of the myosin working stroke (12, 13, 17) and  
86 transitions in the ribosome (16) that likely would have been obscured using other analysis  
87 methods. While this is a powerful tool for analyzing single-molecule data, there is no  
88 software in the public domain that is tailored to performing these calculations, and this  
89 has limited the adoption of these tools by many groups.

90           We have developed a MATLAB-based computational tool, Software for Precise  
91 Analysis of Single Molecules (SPASM), with a graphical user interface for the  
92 identification and ensemble averaging of single-molecule trajectories. This computational  
93 tool utilizes several conceptual advances, including an optimized method for identifying  
94 binding interactions from noisy data and improved precision in determining the exact  
95 initiation and termination times of binding interactions using a change point algorithm.  
96 Using both simulated and experimental data sets, we demonstrate that these advances  
97 permit the generation of accurate, high-resolution ensemble averages using fewer  
98 individual binding trajectories than were previously required. Our easy-to-use

99 computational tool includes an intuitive graphical user interface and is offered both as  
100 open source code and as a standalone program which does not require full installation of  
101 MATLAB. Finally, we provide a user guide, a separate tool for simulating data, and sample  
102 data sets to help other researchers apply this tool to their own single-molecule data.

## 103 **Methods**

### 104 *Implementation of the computational tool*

105 The SPASM computational tool, which includes a graphical user interface, was  
106 written in MATLAB (MathWorks). The program uses the Signal Processing Toolbox and  
107 the Optimization Toolbox, but neither toolbox is required for analysis. The code was  
108 tested on MATLAB versions R2017b through R2020a for both Windows and macOS  
109 operating systems. Standalone versions of the program for both Windows and macOS  
110 were generated using the MATLAB Compiler. For more details, see the Supporting  
111 Materials.

112

### 113 *Detection of binding interactions*

114 Binding interactions between a motor and its track in the optical trap can be  
115 identified using either a variance (18) or a covariance (2, 19) threshold, since the binding  
116 of a motor to its track causes a reduction in both the variance and covariance of the two  
117 beads (**Fig. 2**). The covariance between the beads at any time,  $t$ , is calculated by:

$$118 \quad \text{Cov}_t(A, B) = E_{w_c, t}[A * B] - E_{w_c, t}[A] * E_{w_c, t}[B]$$

119 where  $A$  is the position of one bead (bead A),  $B$  is the position of the other bead (bead  
120 B), and  $E_{w_c, t}[X]$  denotes the mean of  $X$  over a window of size  $w_c$  centered at  $t$ . Before  
121 generating a histogram of covariance values, the covariance is smoothed using a second-  
122 order Savitzky-Golay filter with window size  $w_s$  to remove high-frequency noise. The  
123 values of  $w_c$  and  $w_s$  can be optimized using the computational tool. See the Supporting  
124 Materials for details.

125           A histogram of the filtered covariance between the two beads shows two distinct  
126 populations corresponding to bound (B) and unbound (U) states (**Fig. 2**). This histogram  
127 can be used to determine covariance thresholds for detecting binding interactions (10).  
128 We use one of two methods to detect binding interactions from the covariance: (1)  
129 assigning a single threshold based on the minimum value between the covariance peaks  
130 or (2) using a peak-to-peak method which requires that the covariance extend between  
131 the bound peak and the unbound peak. The advantages and disadvantages of these  
132 methods are discussed in detail in the Results and Discussion.

133           Once potential binding interactions have been identified, temporal thresholds can  
134 be applied to filter the interactions. Any observed reductions in the covariance which are  
135 shorter than a user-defined minimum duration are ignored to lower the chance of  
136 mistakenly identifying random correlated noise as a binding interaction. Also, any two  
137 binding interactions which are separated in time by less than a user-defined minimum  
138 separation are ignored to lower the chance of mistakenly identifying random noise as  
139 premature detachment between the motor and the track. Note that this filtering takes  
140 place after the change points have been located.

141

142 *Binding interaction alignment using a change point algorithm and the generation of*  
143 *ensemble averages*

144           Constructing ensemble averages requires the synchronization of individual binding  
145 interactions at transitions between the bound and unbound states. Here, we implement a  
146 change point algorithm to identify transitions. This algorithm uses maximum likelihood  
147 estimation to locate the times, or change points, where changes in both the mean and



148 variance of each bead's position have most likely occurred. For each binding interaction  
149 identified using covariance thresholds, the algorithm searches for the change points  
150 within a window of data. For the  $k^{\text{th}}$  binding interaction, this window spans from

$$152 \quad t_1 = t_{k,\text{start}} - 0.49 * \min (t_{k,\text{end}} - t_{k,\text{start}}, t_{k,\text{start}} - t_{k-1,\text{end}})$$

151 to

$$153 \quad t_N = t_{k,\text{end}} + 0.49 * \min (t_{k,\text{end}} - t_{k,\text{start}}, t_{k+1,\text{start}} - t_{k,\text{end}})$$

154 where  $t_{k,\text{start}}$  and  $t_{k,\text{end}}$  denote the beginning and end times of the  $k^{\text{th}}$  interaction as  
155 estimated by the covariance threshold method. The window must be wide enough that it  
156 includes the entirety of the  $k^{\text{th}}$  interaction but not so wide that it contains part of another  
157 interaction. The computational tool automatically searches the default window for change  
158 points, but it also allows for manual adjustment of both the search window and the  
159 identified change points.

160 The algorithm considers the average position between beads A and B during this  
161 window. For each pair of time points within the window,  $(t_i, t_j)$ , the algorithm calculates  
162 the likelihood that these points coincide with changes in the mean and variance of the  
163 data. Each pair divides the window into three intervals:  $[t_1, t_i]$ ,  $[t_{i+1}, t_j]$ , and  $[t_{j+1}, t_N]$ ,  
164 where  $1 < i < j < N$ . The log-likelihood score,  $L_{(t_i, t_j)}$ , assigned to  $(t_i, t_j)$  measures how well  
165 normal distributions can be fit to these intervals of data:

$$166 \quad L_{(t_i, t_j)} = - \left[ \frac{j-i}{2} \ln \left( \sigma^2_{[t_{i+1}, t_j]} \right) \right] - \left[ \frac{N-j+i}{2} \ln \left( \sigma^2_{[t_1, t_i] \cup [t_{j+1}, t_N]} \right) \right]$$

167 where  $\sigma^2$  is the variance of the data during the corresponding interval (see the Supporting  
168 Materials for the derivation).  $L$  is maximized where the values of  $t_i$  and  $t_j$  best divide the

169 window into three sequences of normally distributed data, and these values of  $t_i$  and  $t_j$   
170 are then assigned as the change points.

171 After synchronization at the change points, both time forward and time reversed  
172 ensemble averages of individual binding interactions are generated from the average of  
173 the two beads' positions using well-established methods (16). Shorter-lived binding  
174 interactions are extended in time to match the duration of the longest-lived binding  
175 interaction. The value of this extension equals the average position of the beads during  
176 either the first or last 5 ms of the binding interaction for the time reversed and time forward  
177 averages, respectively.

178

#### 179 *Generation of simulated single-molecule data*

180 To test the accuracy of the program and to aid in the selection of proper window  
181 sizes for the analysis of experimental data, we created an additional program to simulate  
182 data that resembles single-molecule interactions with user-defined substep sizes and  
183 kinetics. The code for this program is provided alongside SPASM so that users can adapt  
184 the simulation parameters for their system of interest. Rather than explicitly solving the  
185 equations of motion for the optically trapped beads, the parameters used for simulation  
186 can be empirically varied until the simulated data matches the experimental data.  
187 Trapping data is simulated using a continuous-time Markov jump process in which the  
188 motor switches among a baseline detached state and two successive attached states,  
189 each with a unique displacement, representing a motor with a two-substep working  
190 stroke. The user can set the number of states, the rates of transitioning between the  
191 states, and the displacements of each state. High-frequency Gaussian noise is added to

192 simulate Brownian motion. To simulate mechanical coupling between the beads (i.e.,  
193 higher covariance), a fraction of the noise in each bead's position,  $f$ , is shared between  
194 the two beads. When the motor is dissociated from its track,  $f$  is set to a larger number so  
195 that the motion of the two beads is correlated. When the motor is bound to the track,  $f$  is  
196 set to a lower number, resulting in a lower covariance. Drift in the system is simulated by  
197 the addition of low-frequency noise. For additional details, see the Supporting Materials  
198 and the provided code.

199

### 200 *Analysis of simulated data*

201 To test our analysis approach, we generated simulations with well-defined  
202 characteristics. Data were simulated with a 2 kHz sampling rate. First, we generated 10  
203 data sets (sets 1-10), each containing 100 binding interactions, to simulate beta cardiac  
204 myosin based on previous optical trapping and kinetic measurements (7, 20, 21). The  
205 rate of transitioning from the detached state to the first attached state was set to  $0.5 \text{ s}^{-1}$ .  
206 The rate of transitioning from the first attached state to the second attached state was set  
207 to  $70 \text{ s}^{-1}$ , matching the rate of ADP release (22). The rate of transitioning from the second  
208 attached state to the detached state was  $4 \text{ s}^{-1}$ , matching the rate of ATP-induced  
209 actomyosin dissociation at  $1 \mu\text{M}$  ATP. The myosin was modeled to have a two-substep  
210 working stroke with a 4.7 nm substep followed by a second substep of 1.9 nm (7).

211 We then generated 10 more data sets to analyze with SPASM (sets 11-20). Each  
212 of these sets of data contained 100 simulated binding interactions. The rate of  
213 transitioning from the detached state to the first attached state remained at  $0.5 \text{ s}^{-1}$ . The  
214 rate of transitioning from the first attached state to the second attached state, however,

215 was much lower at 5 s<sup>-1</sup>, and the rate of transitioning from the second attached state to  
216 the detached state was 2 s<sup>-1</sup>. As before, the myosin was modeled to have a two-substep  
217 working stroke with a 4.7 nm substep followed by a second substep of 1.9 nm.

218 With the simulated data, the exact locations of transition points between the bound  
219 and unbound states are known, allowing us to test the performance of different analysis  
220 methods with regards to: (1) the frequency of false positive binding interactions (i.e., when  
221 the bound state is incorrectly detected while the motor is actually unbound), (2) the  
222 number of false negative binding interactions (i.e., when the unbound state is incorrectly  
223 detected while the motor is actually bound), and (3) the error in determining the correct  
224 initiation and termination times of each binding interaction.

225 To determine the number of false positives, each detected binding interaction was  
226 mapped to the nearest overlapping real binding interaction. If a detected binding  
227 interaction did not overlap with any real binding interactions, it was counted as a false  
228 positive. If multiple detected binding interactions were mapped to the same real binding  
229 interaction, all but the closest were also counted as false positives. As we fixed the  
230 number of simulated binding interactions within each data set, rather than the total  
231 duration of each data set, the data sets typically varied in duration. A longer set of data is  
232 expected to result in more false positives, and so the frequency of false positives was  
233 calculated by dividing the number of false positives by the duration of the data set. To  
234 determine the number of false negatives, each real binding interaction was mapped to  
235 the nearest overlapping detected binding interaction. If a real binding interaction did not  
236 overlap with any detected binding interactions, it was counted as a false negative. If  
237 multiple real binding interactions were mapped to the same detected binding interaction,

238 all but the closest were also counted as false negatives. The error was calculated as the  
239 difference between the computationally identified transition points and the nearest  
240 simulated transition points for which the corresponding binding interactions overlapped.

241

#### 242 *Statistical analysis*

243 Simulated binding interactions were detected using either the single threshold  
244 method or the peak-to-peak method, and the frequency of false positives and the number  
245 of false negatives were determined. To test for a significant difference in the mean  
246 frequency of false positives or the mean number of false negatives between the two  
247 methods, p-values were obtained from the independent two-sample t-test. To test if the  
248 median error of the detected transition points was significantly changed with the addition  
249 of the change point algorithm, p-values were obtained from the Wilcoxon rank sum test.

250 Ensemble averages were generated from each method of analysis, as well as from  
251 the known locations of actual simulated binding interactions. To extract parameters from  
252 the ensemble averages, exponential curves were fit to each average, yielding estimates  
253 for the substep sizes and rates of the simulated data. For each extracted parameter, a  
254 Kruskal-Wallis test was used followed by pairwise Wilcoxon rank sum tests to determine  
255 p-values.

256

#### 257 *Design of optical trapping apparatus*

258 Experiments were performed on a custom-built, microscope free dual beam optical  
259 trap, based on (23, 24). The optical layout is described in the Supporting Materials and  
260 Methods (**Fig. S1**). Briefly, the output from a 10 W 1064 nm laser beams (IPG Photonics)

261 was rotated by 45 degrees and then separated into vertically and horizontally polarized  
262 components to form 2 independent traps. Optical traps were independently steerable  
263 using acoustic optical deflectors (Gooch and Housego) and frequency synthesizer boards  
264 under FPGA control (Analog Devices, AD9910 Direct Digital Synthesis evaluation  
265 boards). The displacement of the beads from the center of the optical trap was measured  
266 at the back focal plane using two quadrant photodiodes (First Sensor). Data were low  
267 pass filtered (Frequency Devices) to the Nyquist frequency and digitized on a National  
268 Instruments FPGA board (PCIe 7852) with simultaneously sampling analog to digital  
269 converters. System control was accomplished by custom software written in LabView. 3D  
270 stage control was achieved using a piezoelectric stage (Mad City Labs). Fluorescence  
271 was illuminated using the output of a 50 mW 532 laser (Crystalaser). Imaging was  
272 performed using an EMCCD camera (Andor).

273

#### 274 *Optical trapping experiments*

275 Porcine cardiac myosin and actin were purified from cryoground tissue (Pelfreez)  
276 as previously described (25, 26). Bead coated flow cells were assembled as previously  
277 described (2, 7, 8). All experiments were performed in KMg25 buffer (60 mM MOPS pH  
278 7.0, 25 mM KCl, 2 mM EGTA, 4 mM MgCl<sub>2</sub>, 1 mM DTT). All buffers and dilutions were  
279 prepared fresh each day. Biotin-labeled actin (2 μM) was prepared using 10% biotin actin  
280 (Cytoskeleton) in KMg25 buffer. The mixture was allowed to polymerize for 20 minutes,  
281 and then the actin was stabilized using tetramethylrhodamine isothiocyanate-labeled  
282 phalloidin. Streptavidin beads (Bangs Labs) were washed in 1 mg/mL BSA in KMg25  
283 buffer three times. Flow cells were loaded with myosin (4-20 nM in KMg25 with 200 mM

284 KCl) for 5 minutes and then blocked with 1 mg/mL BSA for 5 minutes. Activation buffer  
285 contained KMG25 with the addition of 1  $\mu$ M ATP, 192 U/mL glucose oxidase, 48  $\mu$ g/mL  
286 catalase, 1 mg/mL glucose, and  $\sim$ 25 pM Biotin rhodamine-phalloidin actin. A small  
287 amount (4  $\mu$ L) of streptavidin beads were loaded into the flow cell, and the flow cell was  
288 sealed with vacuum grease. Trapping experiments were conducted as previously  
289 described (2). Two streptavidin beads were optically trapped, forming a bead-actin-bead  
290 dumbbell. Trap stiffness was determined by fitting of the power spectral density collected  
291 at 20 kHz. The bead-actin-bead dumbbell was pretensed to approximately 2-3 pN and  
292 then lowered onto a surface bead to search for binding interactions. Approximately 1 in 5  
293 beads showed binding interactions. Data were acquired at 2 kHz and filtered to 1 kHz.

## 294 **Results and Discussion**

### 295 *Ensemble averaging of single-molecule binding interactions*

296 Ensemble averaging is a powerful method for analyzing single-molecule data,  
297 since it can uncover subtle molecular transitions obscured by Brownian motion (13, 16).  
298 In ensemble averaging, the time-dependent trajectories of individual binding interactions  
299 are synchronized and then averaged. While ensemble averaging techniques are broadly  
300 applicable, we will focus in this paper on their application to studying the interaction  
301 between myosin molecular motors and actin.

302 Using ensemble averaging of optical trapping data, it has been shown that many  
303 myosin isoforms have a two-substep working stroke, where the first substep corresponds  
304 to the release of inorganic phosphate and the second substep corresponds to a transition  
305 associated with ADP release (**Fig. 1C-D**) (7-10, 12-14, 17, 27). It is difficult to distinguish  
306 the second transition from raw data traces due to Brownian motion. However, ensemble  
307 averaging allows for easier visualization of this transition by increasing the signal-to-noise  
308 ratio.

309 One can collect information about both the kinetics and mechanics of the working  
310 stroke substeps from the post-synchronized ensemble averaged trajectories of individual  
311 binding interactions (13, 16). These interactions can be synchronized upon actomyosin  
312 attachment and then averaged forward in time or, alternatively, synchronized upon  
313 actomyosin detachment and then averaged backward in time (**Fig. 1E-F**). The magnitude  
314 of the initial displacement seen in the time forward averages gives the size of the first  
315 substep of the myosin working stroke, a transition which occurs within the dead time of  
316 typical optical tweezer instruments. The amplitude of the subsequent exponential rise in



317 displacement in the time forward averages gives the size of the second substep of the  
318 working stroke. The rate of this exponential rise is the rate of transitioning from the first  
319 substep to the second substep, and it is associated with ADP release in myosins (13).  
320 For the time reversed ensemble averages, the exponential rise in displacement prior to  
321 detachment has an amplitude equal to the size of the second substep, and the rate of this  
322 exponential gives the rate of transitioning from the second substep to the detached state,  
323 a transition which corresponds to ATP-induced actomyosin dissociation (13).

324

### 325 *MATLAB-based computational tool for generating ensemble averages*

326 Here, we have generated an easy-to-use MATLAB-based computational tool,  
327 SPASM, which finds binding interactions within noisy data, accurately identifies  
328 transitions between the bound and unbound states, and then generates ensemble  
329 averages. This tool includes several improvements and optimized procedures for both the  
330 identification and alignment of binding interactions, which are discussed below. The tool  
331 features a graphical user interface for ease of use and is packaged with an accompanying  
332 user guide. We provide the code for this tool as well as a compiled executable file that  
333 does not require a full installation of MATLAB. We also provide a resource for simulating  
334 single-molecule data, as well as the sample simulated data sets used in our analysis (see  
335 Supporting Materials).

336

### 337 *Generation of covariance histogram to identify binding interactions*

338 The first step in generating ensemble averages is the identification of binding  
339 interactions from single-molecule data traces. When optically trapped, the two beads in

340 the bead-actin-bead dumbbell undergo fluctuations in their position due to Brownian  
341 motion (**Fig. 2A**). The motion of these beads is mechanically coupled through the actin  
342 filament, as evidenced by the covariance between their positions (**Fig. 2B**). When the  
343 surface-bound motor binds to the actin filament, it causes several pronounced changes:  
344 (1) it reduces the positional variance of each bead's position, (2) it reduces the coupled  
345 motion (covariance) of the two trapped beads, and (3) it displaces the mean position of  
346 each bead. The majority of analysis methods for identifying binding interactions utilize the  
347 changes in the mean position, variance, and/or covariance of the optically trapped beads  
348 upon binding to actin (11, 18, 19, 24, 28).

349 One popular method for selecting binding interactions is to set a threshold based  
350 on the variance or covariance of the beads. The choice of using a variance or covariance  
351 threshold for binding interaction identification will partially be dictated by the optical trap  
352 layout. For systems which only monitor the position of a single bead, one must use a  
353 variance threshold for the position of the single bead. For systems where both bead  
354 positions are monitored, a covariance threshold is preferred since it is less sensitive to  
355 noisy fluctuations in the data. While we focus on the use of our computational tool with a  
356 covariance threshold, the same approaches and conclusions will hold true for a variance  
357 threshold based on the position of one bead. A version of SPASM that uses a variance  
358 threshold is provided (see Supporting Materials).

359 Our computational tool identifies binding interactions from the change in the  
360 covariance between the positions of the two trapped beads that occurs upon myosin  
361 binding to actin. SPASM first calculates the covariance over a sliding window in time and  
362 then smooths the covariance over a separate window. With properly chosen window

363 lengths, the histogram of the covariance values reveals two populations (**Fig. 2C**), where  
364 the higher covariance population corresponds to unbound states and the lower population  
365 corresponds to bound states (2). One can then select binding interactions based upon  
366 thresholds that distinguish between these two populations (see *Selection of binding*  
367 *interactions* below).

368         The success of this approach depends on the degree of separation between the  
369 two peaks in the covariance histogram. If the peaks are not well separated, the analysis  
370 is more susceptible to false and/or missed binding interactions. The ability to generate a  
371 histogram with two well separated peaks depends partly on the selection of proper  
372 window lengths for the calculation and smoothing of the covariance. Optimal values for  
373 these parameters, in turn, depend on the kinetics of the myosin's interaction with actin,  
374 the compliance of the myosin and/or myosin-surface attachment, the pretension between  
375 the optically trapped beads, and the noise in the system. Therefore, the window lengths  
376 often need to be determined empirically. If the kinetics of the myosin's transitions are  
377 known from other experimental measurements, one can simulate data and select window  
378 lengths which optimize analysis of the simulated data (see Supporting Materials). If kinetic  
379 information about the myosin's transitions is unknown, it may not be possible to generate  
380 meaningful simulated data. In these cases, the window lengths can be determined  
381 empirically through the computational tool's graphical user interface, which allows the  
382 user to vary the window lengths until a suitable bimodal covariance histogram is achieved.

383

384 *Selection of binding interactions*

385           Once a suitable covariance histogram with two well-defined peaks has been  
386 generated, the next step is to determine proper thresholds for the covariance which will  
387 be used to detect binding interactions. One possibility for distinguishing the bound state  
388 from the unbound state is to use a single covariance threshold located at the minimum  
389 value between the two peaks of the covariance histogram (10). Here, detected  
390 interactions start when the covariance drops below this threshold value, and they end  
391 when the covariance rises back above this threshold value (**Fig. 2D**). Alternatively, one  
392 could identify the binding interactions using a set of two different covariance thresholds,  
393 located at the two peaks of the covariance histogram. In this ‘peak-to-peak’ approach, a  
394 binding interaction is considered to start when the covariance drops from the threshold  
395 defined by the unbound peak to the threshold defined by the bound peak. Likewise, a  
396 binding interaction is considered to end when the covariance rises from the threshold  
397 defined by the bound peak to the threshold defined by the unbound peak (**Fig. 2D**).

398           We tested the abilities of the single threshold and peak-to-peak methods to  
399 accurately detect simulated binding interactions between actin and cardiac myosin.  
400 Interactions were simulated using a continuous-time Markov jump process with kinetics  
401 and mechanics based on previously measured parameters for ventricular cardiac myosin  
402 (7, 21, 22) (see Materials and Methods for details). With simulated data, the exact  
403 locations of the binding interactions are known, allowing for easy comparison between  
404 the simulated interactions and the interactions detected by the computational tool using  
405 either method (**Fig. 2D**).

406           We generated 10 independent sets of simulated data, each containing 100 binding  
407 interactions (sets 1-10). For each data set, we used our computational tool to calculate

408 the covariance histogram, locate the peaks and minimum of the histogram, and identify  
409 binding interactions using either the single threshold method or the peak-to-peak method.  
410 When we used a single threshold to identify binding interactions, we correctly detected  
411 80 +/- 4 of the 100 binding interactions on average, and we incorrectly detected 4 +/- 1  
412 false positive binding interactions per 100 seconds of data, on average (**Table 1**). The  
413 reported errors are standard deviations. When we used the peak-to-peak method to  
414 identify binding interactions, we correctly detected 65 +/- 5 of the 100 binding interactions  
415 on average, and we did not detect any false positive binding interactions. Although the  
416 peak-to-peak method misses a greater number of binding interactions, the false positive  
417 rate is lower for this method ( $p < 0.001$ ).

418 A single threshold could work well for selecting binding interactions if the two  
419 populations of the histogram are sufficiently distinct. However, it is often not possible to  
420 obtain sufficient separation between the peaks due to factors that lower the signal-to-  
421 noise ratio (e.g., system noise, insufficient pretension between the beads, fast binding  
422 kinetics). In these cases, this single threshold approach is prone to identifying false  
423 positive interactions, where the covariance crosses the threshold even though the  
424 actomyosin has remained in an unbound state. These false positive binding interactions  
425 do not generate a net displacement in the optical trap, and so their inclusion in the  
426 ensemble averages is expected to lead to an underestimation of the true size of the  
427 working stroke. A methodology has been developed which attempts to correct for these  
428 false positive interactions through the use of normalization factors (10). Alternatively, as  
429 the vast majority of these false positive interactions arise due to either Brownian motion  
430 (or system noise) induced rapid downward spikes in the covariance (which lead to very

431 short detected interactions) or rapid upward spikes in the covariance (which lead to  
432 multiple detected interactions in quick succession), it is possible to avoid these false  
433 positive interactions through the use of temporal filters that exclude interactions which are  
434 too short or pairs of interactions which are too close to one another. However, it is not  
435 always easy to determine appropriate values for these temporal filters. Further, the use  
436 of these temporal filters may lead to the exclusion of many correctly identified binding  
437 interactions. When we used optimized values for these filters to exclude all of the false  
438 positive interactions that were detected by the single threshold method, we were left with  
439 fewer interactions than were detected by the peak-to-peak method (**Fig. S2**).

440 With the peak-to-peak method, the criteria for detecting a binding interaction is  
441 much stricter than with the single threshold method, and the number of identified false  
442 positive binding interactions is expected to decrease while the number of missed, short-  
443 lived binding interactions increases. Unlike the inclusion of false positive interactions, the  
444 exclusion of these missed binding interactions does not adversely affect the size or shape  
445 of the ensemble averages. Although we demonstrate that the peak-to-peak method  
446 performs better in data traces with moderate separation between the peaks of the  
447 covariance histogram, some experimental data might have better peak separation. In this  
448 case, the single threshold method would be preferable since it maximizes the number of  
449 captured binding interactions. The computational tool allows the user to try both methods,  
450 and it automatically determines appropriate values for the thresholds.

451

452 *Alignment of binding interactions using covariance thresholds*

453           After binding interactions are identified, they must be precisely aligned at the  
454 transitions between the bound and unbound states to generate accurate ensemble  
455 averages. The most critical step in aligning these interactions is the careful determination  
456 of when exactly a transition occurs. Inadequate determination of these transitions will lead  
457 to inaccurate measurements of the substep sizes and/or kinetics. Several methods have  
458 been applied to locate transitions in single-molecule data traces, including Hidden Markov  
459 Models (28) and step finding algorithms (29), but a frequently used method for post-  
460 synchronization is to align the binding interactions based on the same thresholds used to  
461 identify the binding interactions (2, 10, 13).

462           To test the abilities of the single threshold and peak-to-peak methods to accurately  
463 identify the transitions, we used the same 10 simulated data sets containing 100  
464 transitions each, as described previously (sets 1-10). When we used a single threshold  
465 to identify transition times, we found that the detected attachment times occurred 28.2  
466 (95% confidence intervals: +13.8, -21.7) milliseconds after the actual attachment times,  
467 on average (**Table 2**), and the detected detachment times occurred 28.6 (+11.9, -19.1)  
468 milliseconds before the actual detachment times, on average. On the other hand, when  
469 we used the peak-to-peak method to identify transitions, we found that the detected  
470 attachment times occurred 55.5 (+195.5, -69.0) milliseconds before the actual attachment  
471 times, on average, and the detected detachment times occurred 50.4 (+188.1, -64.9)  
472 milliseconds after the actual detachment times, on average. Taken together, the single  
473 threshold method has better temporal resolution when identifying transitions between the  
474 bound and unbound states.

475           When binding interactions are aligned based on the covariance thresholds, it is  
476 assumed that the covariance drops and rises in conjunction with transitions between the  
477 bound and unbound states. With the single threshold method, this is a fairly reasonable  
478 assumption, explaining why it outperforms the peak-to-peak method. Each true transition  
479 point separates more highly correlated bead motion (i.e., the unbound state) from less  
480 highly correlated bead motion (i.e., the bound state). The covariance is calculated over a  
481 window, so when the covariance window is centered at a transition point, the window will  
482 include equal amounts of more highly and less highly correlated data. The covariance at  
483 the transition point should then lie at some intermediate value between the two peaks of  
484 the covariance histogram. However, the single threshold method is not perfect at locating  
485 the transition points. First, while the value of the covariance at a transition point will likely  
486 be near the minimum value between the two peaks of the covariance histogram, there is  
487 no guarantee that it will lie exactly at this minimum value. Additionally, synchronized large-  
488 scale movement of both beads due to the myosin's power stroke can produce transient  
489 spikes in the covariance value during transitions, and these spikes can potentially  
490 decrease the accuracy of the single threshold method in identifying exact transition times.

491           The peak-to-peak method produced poorer alignment than the single threshold  
492 method. When the peak-to-peak method is used to identify transitions, it is assumed that  
493 transitions occur when the covariance crosses the upper threshold, defined by the  
494 position of the unbound peak. This is inherently less accurate for estimating transition  
495 points than the single threshold method. A window of data which has a covariance value  
496 that is similar to the value of the unbound peak contains primarily correlated data and,  
497 therefore, it is unlikely that the center of this window is near the actual transition point. In



498 fact, the calculated transition point using the peak-to-peak method would be expected to  
499 deviate from the actual transition point by at least half the window size.

500 Taken together, our data show that when binding interactions are synchronized  
501 using a single covariance threshold, the resulting ensemble averages are expected to  
502 have better alignment of binding interactions. However, as noted previously, the use of a  
503 single covariance threshold to detect binding interactions is more susceptible to false  
504 positive binding interactions which would lead to an underestimation of the true substep  
505 sizes. The peak-to-peak method is better for binding interaction detection without  
506 including false positives, but it lacks the necessary temporal resolution to accurately align  
507 the detected interactions.

508

#### 509 *Change point algorithm for aligning interactions*

510 Rather than relying on the covariance when estimating transition times, we tested  
511 the use of separate methods for detecting and synchronizing binding interactions. To  
512 improve our ability to locate the transition times of each binding interaction, we  
513 implemented a change point algorithm (see Materials and Methods for details). Change  
514 point algorithms have been used in step finding for transitions in biological processes,  
515 where the algorithm identifies the most likely times in which there was a change in a  
516 parameter such as motor position or rotation of the myosin lever arm (29, 30). We have  
517 adapted the change point algorithm for the three-bead assay, where we search for the  
518 most likely transition times based on changes in both the mean and the variance of the  
519 bead positions, as both of these parameters differ between the bound and unbound states  
520 (**Fig. 3A**). For each binding interaction identified by the covariance threshold method (**Fig.**

521 **3B**), our algorithm examines the positions of the trapped beads in a window surrounding  
522 that interaction and finds the two points (i.e., binding initiation and detachment) within this  
523 window that most likely represent transitions in the mean and variance of the data (**Fig.**  
524 **3C**; see Methods for details).

525 To test the ability of the change point algorithm to accurately identify transition  
526 times, we again analyzed the same 10 sets of simulated data described above (sets 1-  
527 10). We found that the attachment times detected by the change point algorithm occurred  
528 0.5 (+9.0, -5.5) milliseconds after the actual attachment times, on average (**Table 2**), and  
529 the detachment times detected by the change point algorithm occurred 0.7 (+4.8, -4.2)  
530 milliseconds after the actual detachment times, on average (**Table 2**). Statistical testing  
531 demonstrates that the change point algorithm outperforms both the single threshold  
532 method ( $p_{\text{start}} < 0.001$ ,  $p_{\text{end}} < 0.001$ ) and the peak-to-peak method ( $p_{\text{start}} < 0.001$ ,  $p_{\text{end}} <$   
533  $0.001$ ) in identifying transition times. As our simulated data were generated with a  
534 sampling frequency of 2 kHz, these average errors of about 0.5 ms indicate that the  
535 change point algorithm was typically correct within 1 point. It is possible that a higher  
536 sampling frequency would further increase the accuracy.

537 To explore the ability of these three methods to accurately identify transition points,  
538 we generated cumulative distributions of the differences between the detected transition  
539 times and the actual simulated transition times for both the initiation and termination of  
540 the binding interactions (**Fig. 4**). Here, the width of the distribution reveals the precision  
541 of the corresponding method, while the sign and magnitude of the average error reveals  
542 the systematic bias of that method. As expected, the cumulative distributions of errors  
543 generated from the peak-to-peak method are wide, indicating low precision at identifying

544 the transitions, while the distributions generated from the single threshold method are  
545 narrower, indicating higher precision. The distributions generated from the change point  
546 algorithm are very narrow, and the mean error is close to 0. This indicates that the change  
547 point algorithm is very precise and has lower systematic bias than either the single  
548 threshold or peak-to-peak method.

549

### 550 *Comparison of ensemble averages generated using different methods*

551 To test our predictions about the relative accuracy of the ensemble averages when  
552 using each method of analysis, we generated ensemble averages from the 10 sets of  
553 simulated data studied previously (sets 1-10). First, we generated ensemble averages  
554 using the actual locations of all 1000 simulated binding interactions to align the binding  
555 interactions (**Fig. 5A-B**, real). We also generated ensemble averages for each of the 10  
556 sets of data, using the actual locations of the 100 simulated binding interactions within  
557 each set. Exponential curves were fit to each of these averages to estimate the substep  
558 sizes and rates of the simulated myosin working stroke (**Fig. 5C-F**, real; **Table 3**). The  
559 magnitude of substep 1 estimated from the time forward averages was 4.7 (95%  
560 confidence intervals: +0.4, -0.4) nm, on average, while the magnitude of the total step  
561 estimated from the time forward averages was 6.4 (+0.2, -0.2) nm, on average. The  
562 magnitude of substep 1 estimated from the time reversed averages was 5.7 (+0.2, -0.3)  
563 nm, on average, while the magnitude of the total step estimated from the time reversed  
564 averages was 6.5 (+0.1, -0.2) nm, on average. The estimated rate of transitioning from  
565 the first substep to the second substep ( $k_f$ ) was 68.7 (+15.8, -20.9) s<sup>-1</sup>, and the estimated

566 rate of transitioning from the second substep to the detached state ( $k_r$ ) was 4.3 (+2.2, -  
567 1.9)  $s^{-1}$ .

568 We then used either the single threshold method or the peak-to-peak method to  
569 detect binding interactions within each data set. When the single threshold method was  
570 used to detect binding interactions, we applied a filter to ignore any detected interactions  
571 which were shorter than 77 ms or within 63 ms of another detected interaction, to avoid  
572 including false positive interactions (**Fig. S2**; **Fig. S3** shows the effect of including these  
573 false positive binding interactions). To identify transitions between the bound and  
574 unbound states for each interaction, we either included or omitted the change point  
575 algorithm. For each of these analysis methods, we used the binding interactions and  
576 transitions detected over all 10 data sets to generate ensemble averages (**Fig. 5A-B**). As  
577 before, we also generated ensemble averages from the binding interactions detected  
578 within each of the 10 sets of data, and exponential curves were fit to each average to  
579 estimate the substep sizes and rates of the simulated myosin working stroke (**Fig. 5C-F**;  
580 **Table 3**). As expected, using the change point algorithm to align the binding interactions  
581 resulted in the most accurate estimates.

582 When the peak-to-peak method was used to both detect and align the binding  
583 interactions, the ensemble averages were misshapen (**Fig. 5**, PTP). The time forward  
584 average, for example, includes the characteristic increase in displacement but then drops.  
585 This drop is due to the fact that the binding interaction termination times detected by the  
586 peak-to-peak method often came after the actual termination times, leading to the  
587 inclusion of baseline data at the end of the time forward average. The time forward  
588 average also appears to start too late, as the peak-to-peak method typically guesses that

589 binding initiation times occur before they actually do (**Fig. 4**). Exponential curves were  
590 very poorly fit to these ensemble averages.

591 When the single threshold method was used to both detect and align the binding  
592 interactions, the ensemble averages had better overall shape (**Fig. 5**, ST). However,  
593 similar to the averages generated with the peak-to-peak method, misalignment among  
594 the individual trajectories resulted in very gradual transitions between the bound and  
595 unbound states. The time forward average, for example, appears to start too early, as the  
596 single threshold method typically guesses that binding initiation times occur after they  
597 actually do (**Fig. 4**).

598 When the change point algorithm was used to align the binding interactions, the  
599 ensemble averages featured much sharper transitions (**Fig. 5**, PTP/CP and ST/CP).  
600 However, very sharp spikes in displacement occur at the transition times (**Fig. 5A-B**,  
601 PTP/CP and ST/CP). Brownian motion-driven fluctuations in the bead positions can  
602 cause changes in the data from one point to the next which are not due to transitions  
603 between the bound and unbound states. If such noise happens to occur near a real  
604 transition point, it offers an attractive candidate for the change point, and the change point  
605 algorithm may choose that point instead of the less pronounced yet correct transition time.  
606 However, we have shown that the transition times estimated by the change point  
607 algorithm are within 1 to 2 points of the actual simulated transition times, on average  
608 (**Table 2; Fig. 4**), and the resulting ensemble averages are very accurate. Appropriate fits  
609 can be obtained by omitting these spikes from the fitted data.

610 The time reversed ensemble average generated from the actual locations of the  
611 simulated binding interactions led to an overestimate of the magnitude of substep 1 (**Fig.**

612 **5B-C; Table 3**). To generate the time reversed ensemble average, short-lived binding  
613 interactions are extended in time to match the duration of the longest-lived binding  
614 interaction, and the value of this extension equals the average position of the beads  
615 during the first 5 ms of the binding interaction. The rate of transitioning from the first  
616 substep to the second substep in our simulated data was 70 s<sup>-1</sup>, matching the rate of ADP  
617 release for beta cardiac myosin (22). Because of this fast rate, a large number of  
618 transitions to the second substep occur before the 5 ms used to generate the extensions,  
619 leading to inaccurate extension values. The proportion of binding interactions which are  
620 expected to transition to the second substep within the first 5 ms is given by the integral  
621 of the probability density function:

$$622 \quad \text{proportion of substeps missed} = \int_0^{0.005} k e^{-kt} dt$$

623 For a rate of 70 s<sup>-1</sup>, this proportion is equal to about 30%, and this will lead to an  
624 overestimate of the size of the first substep. A possible fix is to shorten the 5 ms window  
625 used for calculating the extensions, but it then becomes crucial that the binding initiation  
626 times are determined with high accuracy. Neither the single threshold method nor the  
627 peak-to-peak method have sufficient resolution to accurately determine the exact initiation  
628 times (**Fig. 4**). Even the change point algorithm, which we have shown to have an average  
629 error of about 0.5 ms, would be insufficient for generating the time reversed ensemble  
630 averages of interactions with very fast kinetics. It is possible that this could be improved  
631 with faster data sampling. In the case of transitions with slower kinetics, this problem is  
632 easily avoided. When we simulated 1000 binding interactions using much slower rates ( $k_f$   
633 of 5 s<sup>-1</sup> and  $k_r$  of 2 s<sup>-1</sup>, sets 11-20), we were able to generate time forward and time  
634 reversed ensemble averages with accurate step sizes using multiple methods (**Fig. S4**).

635

636 *Performance of the computational tool to analyze experimental data*

637 To test the ability of the computational tool on real experimental data, we  
638 conducted optical trapping experiments using ventricular myosin at 1  $\mu\text{M}$  ATP (**Fig. 6**).  
639 We intentionally collected a small data set consisting of 66 binding interactions from 5  
640 molecules. Binding interactions were identified using the peak-to-peak method, and  
641 transition points were identified using the change point algorithm. The SPASM  
642 computational tool was used to generate cumulative distributions of individual binding  
643 interactions (**Fig. 6B**). The cumulative distributions of the attachment durations is well fit  
644 by a single exponential function. This exponential rate gives the rate of actomyosin  
645 detachment, and it has a value of 4.7  $\text{s}^{-1}$ , which is consistent with the expected rate of  
646 ATP-induced actomyosin dissociation at 1  $\mu\text{M}$  ATP (22). The cumulative distribution of  
647 total working stroke displacements is well fit by a single normal distribution (indicating  
648 likely single molecule conditions), with a mean of displacement of 6.3 nm and a standard  
649 deviation of 9.2 nm. This is consistent with previous measurements of the cardiac myosin  
650 working stroke (7, 21). Ensemble averages (**Fig. 6C**) reveal that, consistent with previous  
651 measurements (7, 21), ventricular cardiac myosin has a two-substep working stroke with  
652 a first substep of 4.4 nm and a total displacement of 6.4 nm. The time forward averages  
653 have a rate of 74  $\text{s}^{-1}$ , which is consistent with the rate of ADP release, and the time  
654 reversed averages have a rate of 3.2  $\text{s}^{-1}$ , which is consistent with the rate of ATP-induced  
655 actomyosin dissociation at 1  $\mu\text{M}$  ATP (22). Taken together, our computational tool can  
656 generate accurate ensemble averages with sharp transitions from a relatively small set  
657 of experimental data.

658

659 *Broader applicability of the approach*

660         The methods presented in this paper were applied to study actomyosin. As noted  
661 previously, the three-bead assay has been used to explore many different single-  
662 molecule systems, including dynein, the lac repressor, and kinesins. Moreover, the  
663 general ideas behind our computational tool are broadly applicable to any set of data  
664 containing well-defined populations which can be distinguished through some aspect of  
665 the data. One such possibility is data obtained from single-molecule FRET experiments.  
666 In the Supporting Materials, we describe how to adapt the change point algorithm to  
667 systems where the desired change points occur in data with different distributions.

668

669 *Limitations*

670         There are a number of limitations accompanying our computational tool and the  
671 methods we use to analyze our data. While the covariance between the position of each  
672 trapped bead in the three-bead assay is very helpful for locating binding interactions  
673 under many circumstances, it does have drawbacks. The covariance is calculated over a  
674 window, and therefore it does not always drop enough during short-lived binding  
675 interactions to register as a genuine binding interaction. Furthermore, depending on the  
676 quality of the data, it may be difficult or even impossible to obtain a covariance histogram  
677 with two distinct populations. This could stem from system compliances. One benefit of  
678 the peak-to-peak method is that the covariance histogram populations do not need to be  
679 completely separated to avoid false positive binding interactions, but a certain degree of  
680 separation is needed to make the covariance useful. Additionally, analysis is dependent



681 on many parameters, including the window sizes used to calculate and smooth the  
682 covariance, and it can be difficult to choose appropriate values for these parameters for  
683 a given experimental system. The computational tool includes features which allow the  
684 user to correct for these drawbacks when they are encountered. Finally, as evidenced by  
685 the ensemble averages generated from our simulated data (**Fig. 5**), ensemble averaging  
686 has limitations for estimating the rates and substep sizes for transitions with very fast  
687 kinetics.

688

### 689 *Summary*

690 Here, we developed a computational tool, SPASM, for the detection and alignment  
691 of single-molecule binding interactions and for the generation of ensemble averages  
692 which can reveal characteristics about the data that are often obscured by noise. We  
693 show that it can be advantageous to use separate techniques for the detection and  
694 alignment of binding interactions. Specifically, we show that the addition of a change point  
695 algorithm to identify transition times can generate precise ensemble averages with  
696 improved alignment. We offer the computational tool, with an intuitive graphical user  
697 interface, along with a user guide so that the reader can apply these methods to their own  
698 data.

699 **Acknowledgements:**

700 Funding for this project was provided by the National Institutes of Health (R01HL141086  
701 to M.J.G., T32EB018266 to S.R.C.).

702

703 **Conflict of interest statement:**

704 All experiments were conducted in the absence of any commercial or financial  
705 relationships that could be construed as a potential conflict of interest.

706

707 **Author contributions:**

708 T.B. wrote the computational tool, simulated data, and analyzed data. W.T.S. built the  
709 optical trap and wrote software for data acquisition. S.R.C. collected optical trapping data.  
710 M.J.G. wrote code for the simulator and analyzed data. T.B. and M.J.G. wrote the first  
711 draft of the paper, and all authors contributed to the final draft.

712

713 **Code availability:**

714 The SPASM computational tool can be found at:

715 <https://github.com/GreenbergLab/SPASM>

716

717 This repository includes the open source code for SPASM (**SPASM.m**), compiled  
718 versions for Windows (**SPASM\_Windows.exe**) and macOS (**SPASM\_macOS.app.zip**),  
719 a versions of the program which analyze only one trapped bead and uses variance  
720 thresholds rather than covariance thresholds (**SPASM\_one\_bead.m**,  
721 **SPASM\_one\_bead\_Windows.exe**, **SPASM\_one\_bead\_macOS.app.zip**), MATLAB

722 code to generate simulated data (**simulator.m**), a user guide for the aforementioned  
723 components (**User\_Guide.pdf**), and the simulated data sets analyzed in this paper (**sets**  
724 **1-20**).

725

## 726 **References**

- 727 1. Spudich, J. A. 2014. Hypertrophic and dilated cardiomyopathy: four decades of basic research on  
728 muscle lead to potential therapeutic approaches to these devastating genetic diseases.  
729 *Biophysical journal* 106:1236-1249.
- 730 2. Greenberg, M. J., H. Shuman, and E. M. Ostap. 2017. Measuring the Kinetic and Mechanical  
731 Properties of Non-processive Myosins Using Optical Tweezers. *Methods Mol Biol* 1486:483-509.
- 732 3. Finer, J. T., R. M. Simmons, and J. A. Spudich. 1994. Single myosin molecule mechanics:  
733 piconewton forces and nanometre steps. *Nature* 368:113-119.
- 734 4. Walter, W. J., M. P. Koonce, B. Brenner, and W. Steffen. 2012. Two independent switches regulate  
735 cytoplasmic dynein's processivity and directionality. *Proceedings of the National Academy of*  
736 *Sciences of the United States of America* 109:5289-5293.
- 737 5. Capitanio, M., M. Canepari, M. Maffei, D. Beneventi, C. Monico, F. Vanzi, R. Bottinelli, and F. S.  
738 Pavone. 2012. Ultrafast force-clamp spectroscopy of single molecules reveals load dependence of  
739 myosin working stroke. *Nature methods* 9:1013-1019.
- 740 6. Pyrpassopoulos, S., H. Shuman, and E. M. Ostap. 2020. Modulation of Kinesin's Load-Bearing  
741 Capacity by Force Geometry and the Microtubule Track. *Biophysical journal* 118:243-253.
- 742 7. Greenberg, M. J., H. Shuman, and E. M. Ostap. 2014. Inherent force-dependent properties of beta-  
743 cardiac myosin contribute to the force-velocity relationship of cardiac muscle. *Biophysical journal*  
744 107:L41-L44.
- 745 8. Greenberg, M. J., T. Lin, Y. E. Goldman, H. Shuman, and E. M. Ostap. 2012. Myosin IC generates  
746 power over a range of loads via a new tension-sensing mechanism. *Proceedings of the National*  
747 *Academy of Sciences of the United States of America* 109:E2433-2440.
- 748 9. Lewis, J. H., M. J. Greenberg, J. M. Laakso, H. Shuman, and E. M. Ostap. 2012. Calcium regulation  
749 of myosin-I tension sensing. *Biophysical journal* 102:2799-2807.
- 750 10. Laakso, J. M., J. H. Lewis, H. Shuman, and E. M. Ostap. 2008. Myosin I can act as a molecular force  
751 sensor. *Science* 321:133-136.
- 752 11. Guilford, W. H., D. E. Dupuis, G. Kennedy, J. Wu, J. B. Patlak, and D. M. Warshaw. 1997. Smooth  
753 muscle and skeletal muscle myosins produce similar unitary forces and displacements in the laser  
754 trap. *Biophysical journal* 72:1006-1021.
- 755 12. Veigel, C., F. Wang, M. L. Bartoo, J. R. Sellers, and J. E. Molloy. 2002. The gated gait of the  
756 processive molecular motor, myosin V. *Nature cell biology* 4:59-65.
- 757 13. Veigel, C., L. M. Coluccio, J. D. Jontes, J. C. Sparrow, R. A. Milligan, and J. E. Molloy. 1999. The  
758 motor protein myosin-I produces its working stroke in two steps. *Nature* 398:530-533.
- 759 14. Veigel, C., M. L. Bartoo, D. C. White, J. C. Sparrow, and J. E. Molloy. 1998. The stiffness of rabbit  
760 skeletal actomyosin cross-bridges determined with an optical tweezers transducer. *Biophysical*  
761 *journal* 75:1424-1438.
- 762 15. Chuan, P., J. A. Spudich, and A. R. Dunn. 2011. Robust mechanosensing and tension generation by  
763 myosin VI. *Journal of molecular biology* 405:105-112.
- 764 16. Chen, C., M. J. Greenberg, J. M. Laakso, E. M. Ostap, Y. E. Goldman, and H. Shuman. 2012. Kinetic  
765 schemes for post-synchronized single molecule dynamics. *Biophysical journal* 102:L23-25.
- 766 17. Capitanio, M., M. Canepari, P. Cacciafesta, V. Lombardi, R. Cicchi, M. Maffei, F. S. Pavone, and R.  
767 Bottinelli. 2006. Two independent mechanical events in the interaction cycle of skeletal muscle  
768 myosin with actin. *Proceedings of the National Academy of Sciences of the United States of*  
769 *America* 103:87-92.
- 770 18. Molloy, J. E., J. E. Burns, J. Kendrick-Jones, R. T. Tregear, and D. C. White. 1995. Movement and  
771 force produced by a single myosin head. *Nature* 378:209-212.

- 772 19. Mehta, A. D., J. T. Finer, and J. A. Spudich. 1997. Detection of single-molecule interactions using  
773 correlated thermal diffusion. *Proceedings of the National Academy of Sciences of the United*  
774 *States of America* 94:7927-7931.
- 775 20. Sung, J., S. Nag, K. I. Mortensen, C. L. Vestergaard, S. Sutton, K. Ruppel, H. Flyvbjerg, and J. A.  
776 Spudich. 2015. Harmonic force spectroscopy measures load-dependent kinetics of individual  
777 human beta-cardiac myosin molecules. *Nat Commun* 6:7931.
- 778 21. Woody, M. S., M. J. Greenberg, B. Barua, D. A. Winkelmann, Y. E. Goldman, and E. M. Ostap. 2018.  
779 Positive cardiac inotrope omecamtiv mecarbil activates muscle despite suppressing the myosin  
780 working stroke. *Nat Commun* 9:3838.
- 781 22. Deacon, J. C., M. J. Bloemink, H. Rezavandi, M. A. Geeves, and L. A. Leinwand. 2012. Identification  
782 of functional differences between recombinant human alpha and beta cardiac myosin motors.  
783 *Cellular and molecular life sciences : CMLS* 69:2261-2277.
- 784 23. Sung, J., S. Sivaramakrishnan, A. R. Dunn, and J. A. Spudich. 2010. Single-molecule dual-beam  
785 optical trap analysis of protein structure and function. *Methods in enzymology* 475:321-375.
- 786 24. Takagi, Y., E. E. Homsher, Y. E. Goldman, and H. Shuman. 2006. Force generation in single  
787 conventional actomyosin complexes under high dynamic load. *Biophysical journal* 90:1295-1307.
- 788 25. Barrick, S. K., S. R. Clippinger, L. Greenberg, and M. J. Greenberg. 2019. Computational Tool to  
789 Study Perturbations in Muscle Regulation and Its Application to Heart Disease. *Biophysical journal*  
790 116:2246-2252.
- 791 26. Clippinger, S. R., P. E. Cloonan, L. Greenberg, M. Ernst, W. T. Stump, and M. J. Greenberg. 2019.  
792 Disrupted mechanobiology links the molecular and cellular phenotypes in familial dilated  
793 cardiomyopathy. *Proceedings of the National Academy of Sciences of the United States of*  
794 *America* 116:17831-17840.
- 795 27. Takagi, Y., R. E. Farrow, N. Billington, A. Nagy, C. Batters, Y. Yang, J. R. Sellers, and J. E. Molloy.  
796 2014. Myosin-10 produces its power-stroke in two phases and moves processively along a single  
797 actin filament under low load. *Proceedings of the National Academy of Sciences of the United*  
798 *States of America* 111:E1833-1842.
- 799 28. Smith, D. A., W. Steffen, R. M. Simmons, and J. Sleep. 2001. Hidden-Markov methods for the  
800 analysis of single-molecule actomyosin displacement data: the variance-Hidden-Markov method.  
801 *Biophysical journal* 81:2795-2816.
- 802 29. Kerssemakers, J. W., E. L. Munteanu, L. Laan, T. L. Noetzel, M. E. Janson, and M. Dogterom. 2006.  
803 Assembly dynamics of microtubules at molecular resolution. *Nature* 442:709-712.
- 804 30. Beausang, J. F., Y. E. Goldman, and P. C. Nelson. 2011. Change-point analysis for single-molecule  
805 polarized total internal reflection fluorescence microscopy experiments. *Methods in enzymology*  
806 487:431-463.

808

809 **Figure legends:**

810

811 **Figure 1. Ensemble averaging of optical trapping data enables the study of**  
812 **mechanochemical coupling.** (A) Diagram of the three-bead assay, where an actin  
813 filament strung between the two optically trapped beads is lowered onto a third surface-  
814 bound bead that is sparsely coated with myosin. (B) Single-molecule binding interactions  
815 between cardiac myosin and actin at 1  $\mu\text{M}$  ATP recorded in the optical trap. The average  
816 position between the optically trapped beads is plotted as a function of time, with blue  
817 horizontal bars indicating detected binding interactions. The mean position and variance  
818 of the beads change upon binding. Brownian motion obscures the second substep of the  
819 working stroke. (C) Schematic showing the two substeps of the myosin working stroke.  
820 (D) Idealized trace showing the position over time of a motor with a two-substep working  
821 stroke without Brownian motion. (E) Procedure for generating time forward ensemble  
822 averages from individual binding interactions. Individual trajectories are aligned at the  
823 initiation of binding and averaged forward in time (black line), and the average is fit with  
824 a single exponential function (red). The y-offset and amplitude of this exponential provide  
825 estimates of the average size of the first and second substeps, respectively. The rate of  
826 this exponential gives the rate of transitioning from the first substep to the second substep.  
827 (F) Procedure for generating time reversed ensemble averages from individual binding  
828 interactions. Individual trajectories are aligned upon dissociation and averaged  
829 backwards in time (black), and the average is fit with a single exponential function (red).  
830 The y-offset and amplitude of this exponential provide estimates of the average size of  
831 the total step and the second substep, respectively. The rate of this exponential gives the  
832 rate of transitioning from the second substep to the detached state.

833

834 **Figure 2. Detection of binding interactions using either the single or peak-to-peak**

835 **covariance threshold method. (A)** Simulated optical trapping data showing the position

836 of each optically trapped bead over time. **(B)** Covariance between the position of the

837 optically trapped beads at each time point gives rise to a bimodal distribution. **(C)** A

838 histogram of covariance values shows two distinct populations which correspond to the

839 bound (B) and unbound (U) states. In the single threshold method, a binding interaction

840 is detected when the covariance crosses the value located at the minimum between the

841 two populations (green). In the peak-to-peak method, two thresholds are placed, one at

842 the peak of each population (red), and a binding interaction is detected when the

843 covariance transitions from one threshold to the other threshold. **(D)** Simulated binding

844 interactions detected by the peak-to-peak method (red), binding interactions detected by

845 the single threshold method (green), and actual simulated binding interactions (blue). The

846 single threshold is more susceptible to false positive interactions (circled). The peak-to-

847 peak method is more susceptible to false negative interactions (boxed).

848

849 **Figure 3. The change point algorithm more precisely identifies transitions between**

850 **bound and unbound states. (A)** Simulated optical trapping data showing the average

851 position between the optically trapped beads over time during a binding interaction. Data

852 obtained during the bound state (purple) are drawn from a normal distribution with a

853 shifted mean and a lower variance when compared to data obtained during the unbound

854 state (black). The change point algorithm seeks to find the time points which best separate

855 the two distributions. The locations of the actual simulated transitions are marked with

856 blue vertical lines. **(B)** Calculated covariance of the bead positions during the simulated  
857 binding interaction in (A). The attachment and detachment times identified by the single  
858 threshold (green) and the peak-to-peak (red) methods are shown with dashed vertical  
859 lines. The actual transitions are marked with solid blue vertical lines. **(C)** The change point  
860 algorithm determines the likelihood that any two points within an extended search window  
861 are the two transition points. (left) Plot of the likelihood assigned to each pair of points  
862 within the search window, viewed from the side (see Materials and Methods for details).  
863 The change points, which occur when the likelihood is maximized, are shown with dashed  
864 yellow vertical lines, while the actual transitions are marked with solid blue vertical lines.  
865 (right) The likelihood viewed from above. Regions of yellow correspond to higher  
866 likelihood, while regions of dark blue correspond to lower likelihood. The two change  
867 points are marked with solid black lines.

868

869 **Figure 4. The change point algorithm minimizes the error when detecting the**  
870 **locations of transitions.** The error was calculated as the difference between the  
871 detected binding times and the actual simulated binding times for simulated data (sets 1-  
872 10). (left) Cumulative distributions of the errors in determining the binding initiation times  
873 using the peak-to-peak method (red), the single threshold method (green), and the  
874 change point algorithm (yellow). Statistical comparisons can be found in Table 2. (right)  
875 Cumulative distributions of the errors when determining the binding termination times  
876 using the peak-to-peak method (red), the single threshold method (green), and the  
877 change point algorithm (yellow).

878



879 **Figure 5. Ensemble averages of simulated binding interactions.** 10 sets of data were  
880 simulated, each containing 100 binding interactions (sets 1-10). Interactions were  
881 detected using either the peak-to-peak (PTP) or the single threshold (ST) method, and  
882 interactions were aligned using either the transitions estimated by the covariance  
883 threshold method or the change points identified by the change point algorithm (CP). **(A)**  
884 (left) For each analysis method, all detected binding interactions were aligned at the  
885 estimated initiation times and averaged together to generate time forward ensemble  
886 averages. (right) For each analysis method, all detected binding interactions were aligned  
887 at the estimated termination times and averaged together to generate time reversed  
888 ensemble averages. Also shown are the time forward and time reversed ensemble  
889 averages generated from the known locations of the actual simulated binding interactions  
890 (blue, real). **(B)** A zoomed in view of the boxed segments of the ensemble averages in A  
891 highlights the misalignment in the averages when the change point algorithm is omitted.  
892 **(C-F)** For each of the 10 simulated sets of data containing 100 binding interactions,  
893 ensemble averages were generated and fit with single exponential functions. The substep  
894 sizes and rates of the simulated myosin working stroke were estimated from the  
895 exponential fits. Box plots show the estimated parameters for each analysis method.  
896 Outliers are indicated by red dots. The substep sizes were estimated from both the time  
897 forward (f) and the time reversed (r) ensemble averages. Horizontal dashed lines show  
898 the values of the simulated parameters. Statistical analysis for each parameter can be  
899 found in **Table 3**.  
900

901 **Figure 6. Ensemble averages of experimental optical trapping data.** The kinetics and  
902 mechanics of cardiac myosin in 1  $\mu\text{M}$  ATP were measured using the three-bead assay.  
903 **(A)** Experimental data trace showing the displacement (D) and covariance (C). **(B)**  
904 Cumulative distributions for the (left) binding interaction durations and (right) total working  
905 stroke displacements. The peak-to-peak method was used to detect binding interactions.  
906 Red lines show the cumulative fits based on (left) exponential and (right) normal  
907 distributions. The characteristic rate obtained from the fit to the distribution of attachment  
908 durations gives a detachment rate equal to  $4.7 \text{ s}^{-1}$ , which is consistent with the expected  
909 rate of ATP-induced actomyosin dissociation at 1  $\mu\text{M}$  ATP. The distribution of total step  
910 sizes has a mean of 6.3 nm and a standard deviation of 9.2 nm. **(C)** The change point  
911 algorithm was used to align the interactions identified using the peak-to-peak method. A  
912 total of 66 binding interactions from 5 molecules were analyzed. The resulting ensemble  
913 averages have estimated substep sizes of 4.4 nm and 2.0 nm. The estimated time forward  
914 rate is  $74 \text{ s}^{-1}$ , and the estimated time reversed rate is  $3.2 \text{ s}^{-1}$ . These values are consistent  
915 with previous measurements using a much larger data set, and they agree well with the  
916 previously measured rates of ADP release and ATP-induced dissociation 1  $\mu\text{M}$  ATP.  
917

918 **Table legends:**

919

920 **Table 1. Detection of binding interactions using either the single or peak-to-peak**  
921 **covariance threshold method.** Average number of correctly identified binding  
922 interactions and frequency of false positive binding interactions detected with the single  
923 threshold method and peak-to-peak method for 10 data sets, each containing 100  
924 simulated binding interactions (sets 1-10). Calculated values were rounded to the nearest  
925 whole number.

926

927 **Table 2. The change point algorithm minimizes the error when detecting the**  
928 **locations of transitions.** Mean and 95% confidence intervals for the error when  
929 detecting transitions within simulated data sets 1-10 with the single threshold method, the  
930 peak-to-peak method, and the change point algorithm. When estimating the binding  
931 initiation times, 645 of 1000 transitions were detected and analyzed for the peak-to-peak  
932 method, 598 transitions were detected and analyzed for the single threshold method, and  
933 644 transitions were detected and analyzed for the change point algorithm. The same  
934 number of transitions were detected and analyzed for each method when estimating the  
935 binding termination times. Note that a negative average error indicates that the detected  
936 transitions occurred before the actual transitions, on average.

937

938 **Table 3. The change point algorithm improves ensemble averages.** 10 sets of data  
939 were simulated, each containing 100 binding interactions (sets 1-10). Interactions were  
940 detected using either the peak-to-peak or the single threshold method, and interactions

941 were aligned using either the transitions estimated by the covariance threshold method  
942 or the change points identified by the change point algorithm. For each data set, ensemble  
943 averages were generated using either the known locations of actual simulated binding  
944 interactions (real) or using the binding interactions detected by each method of analysis.  
945 The averages were fit with exponential functions, and the substep sizes and rates of the  
946 simulated myosin working stroke were estimated from the rates and amplitudes of the  
947 exponential fits. (top) Mean and 95% confidence intervals for the size of substep 1, the  
948 size of substep 2, the total step size, and the rate of transitioning from the first substep to  
949 the second substep, as estimated by the time forward ensemble averages. (bottom) Mean  
950 and 95% confidence intervals for the size of substep 1, the size of substep 2, the total  
951 step size, and the rate of transitioning from the second substep to the detached state, as  
952 estimated by the time reversed ensemble averages. The p-value for a given set of  
953 parameter values estimated by a given analysis method was obtained from the Wilcoxon  
954 rank sum test between those estimated parameter values and the values estimated by  
955 using the known locations of actual simulated binding interactions (real).

956 **Figure 1**

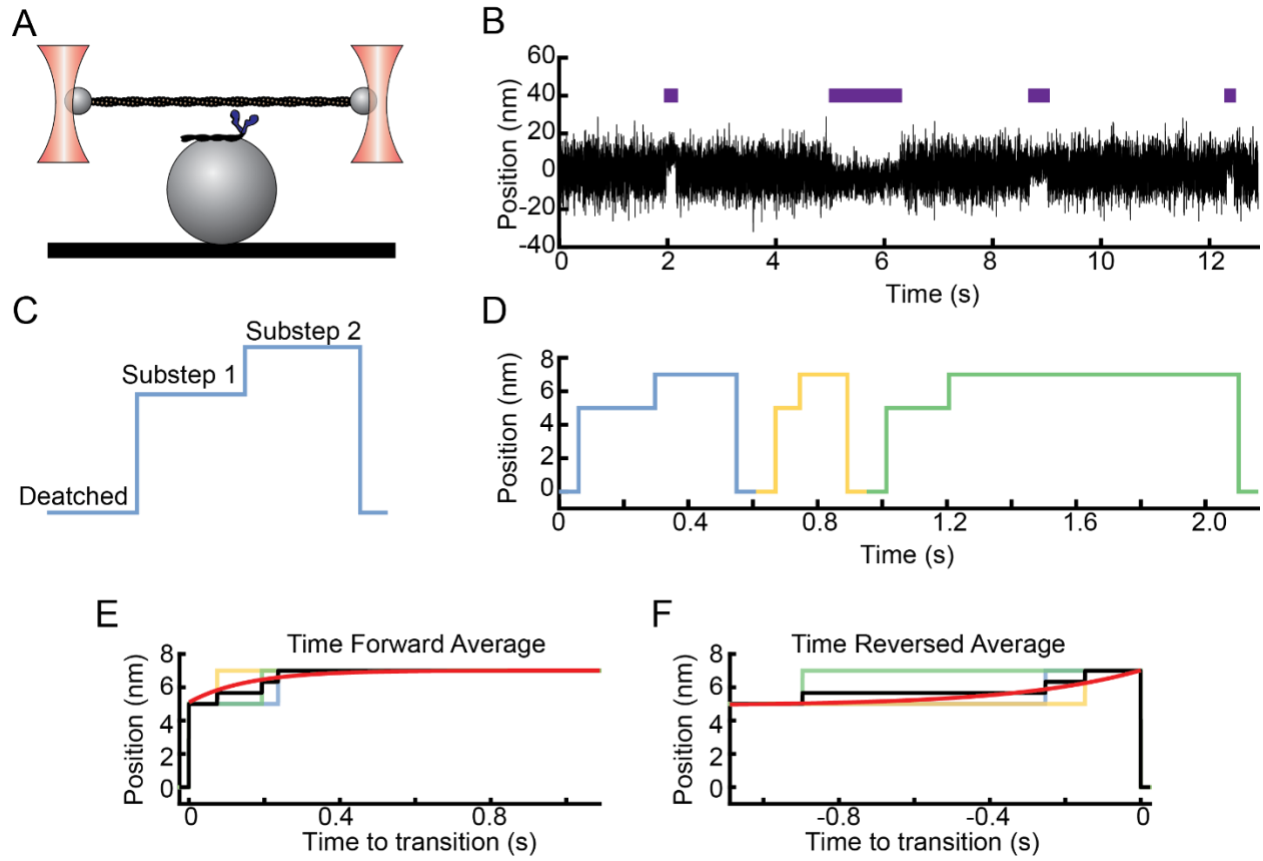

957

958 **Figure 2**

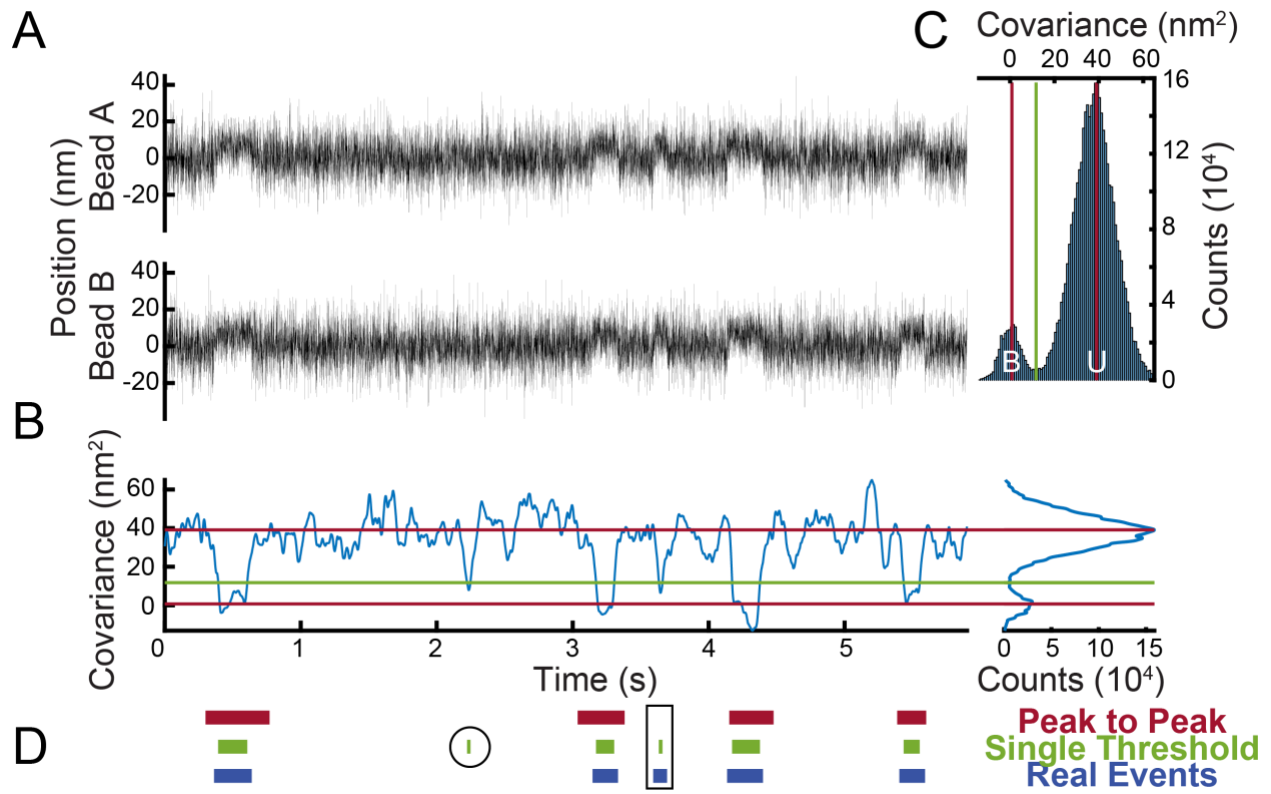

959

960 **Figure 3**

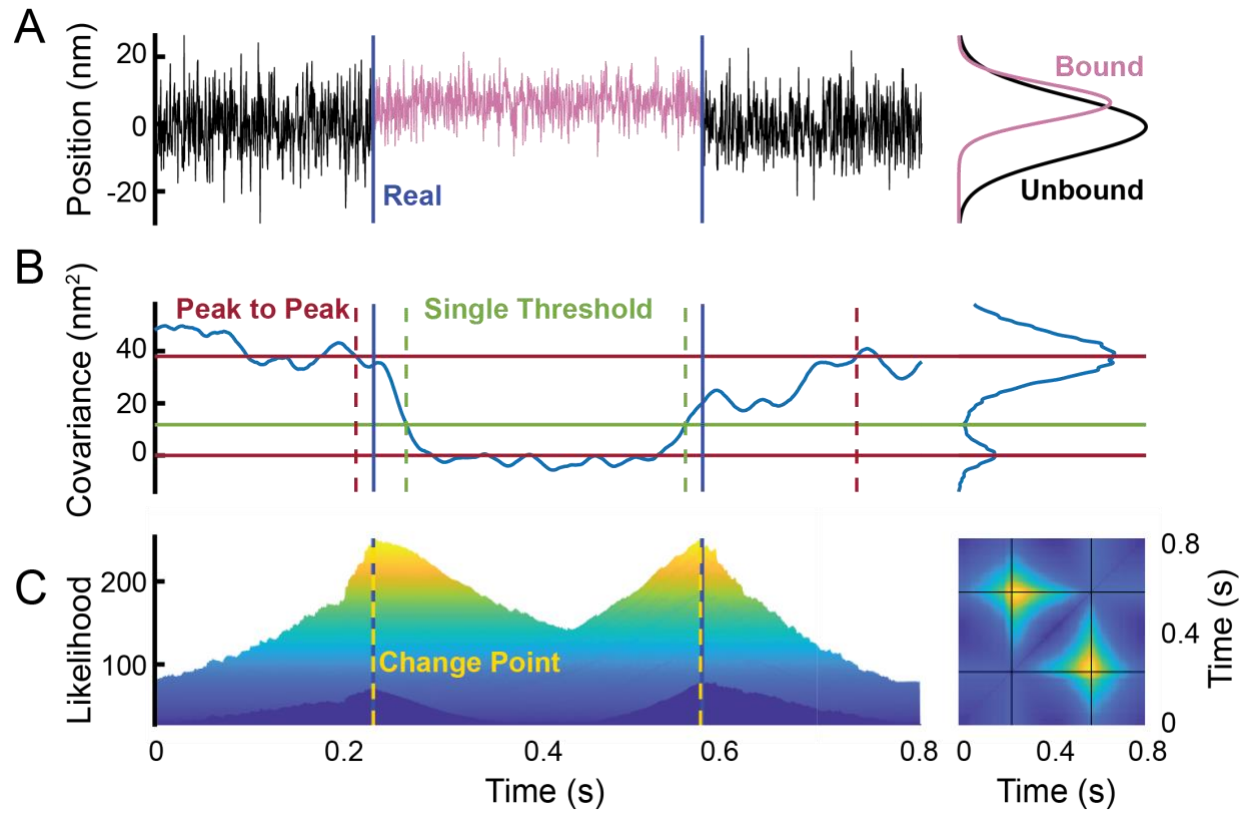

961

962 **Figure 4**

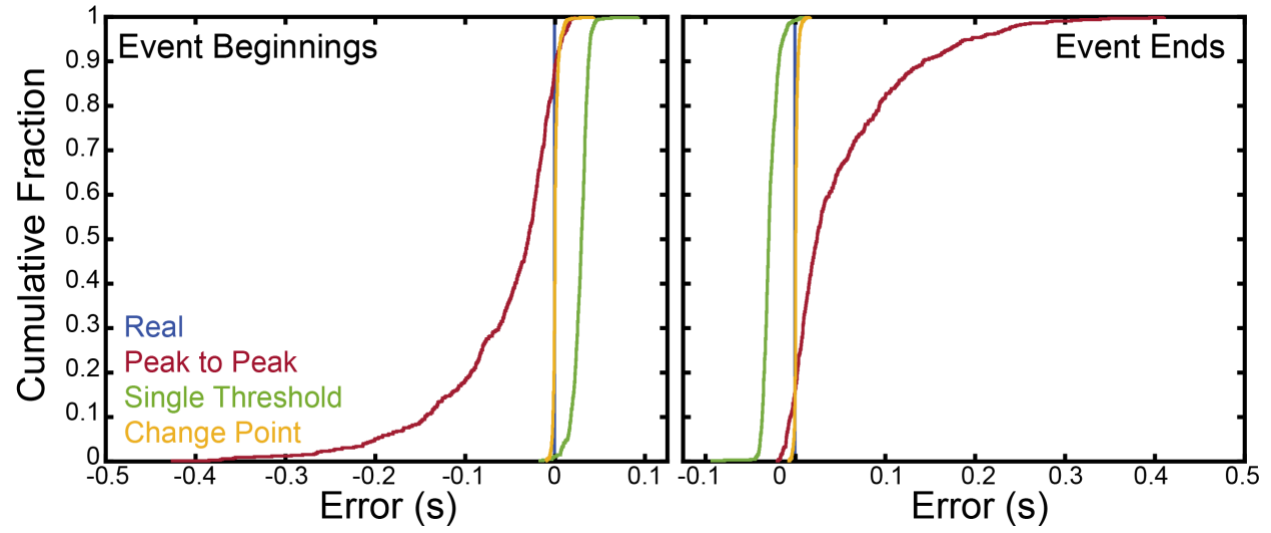



964 **Figure 5**

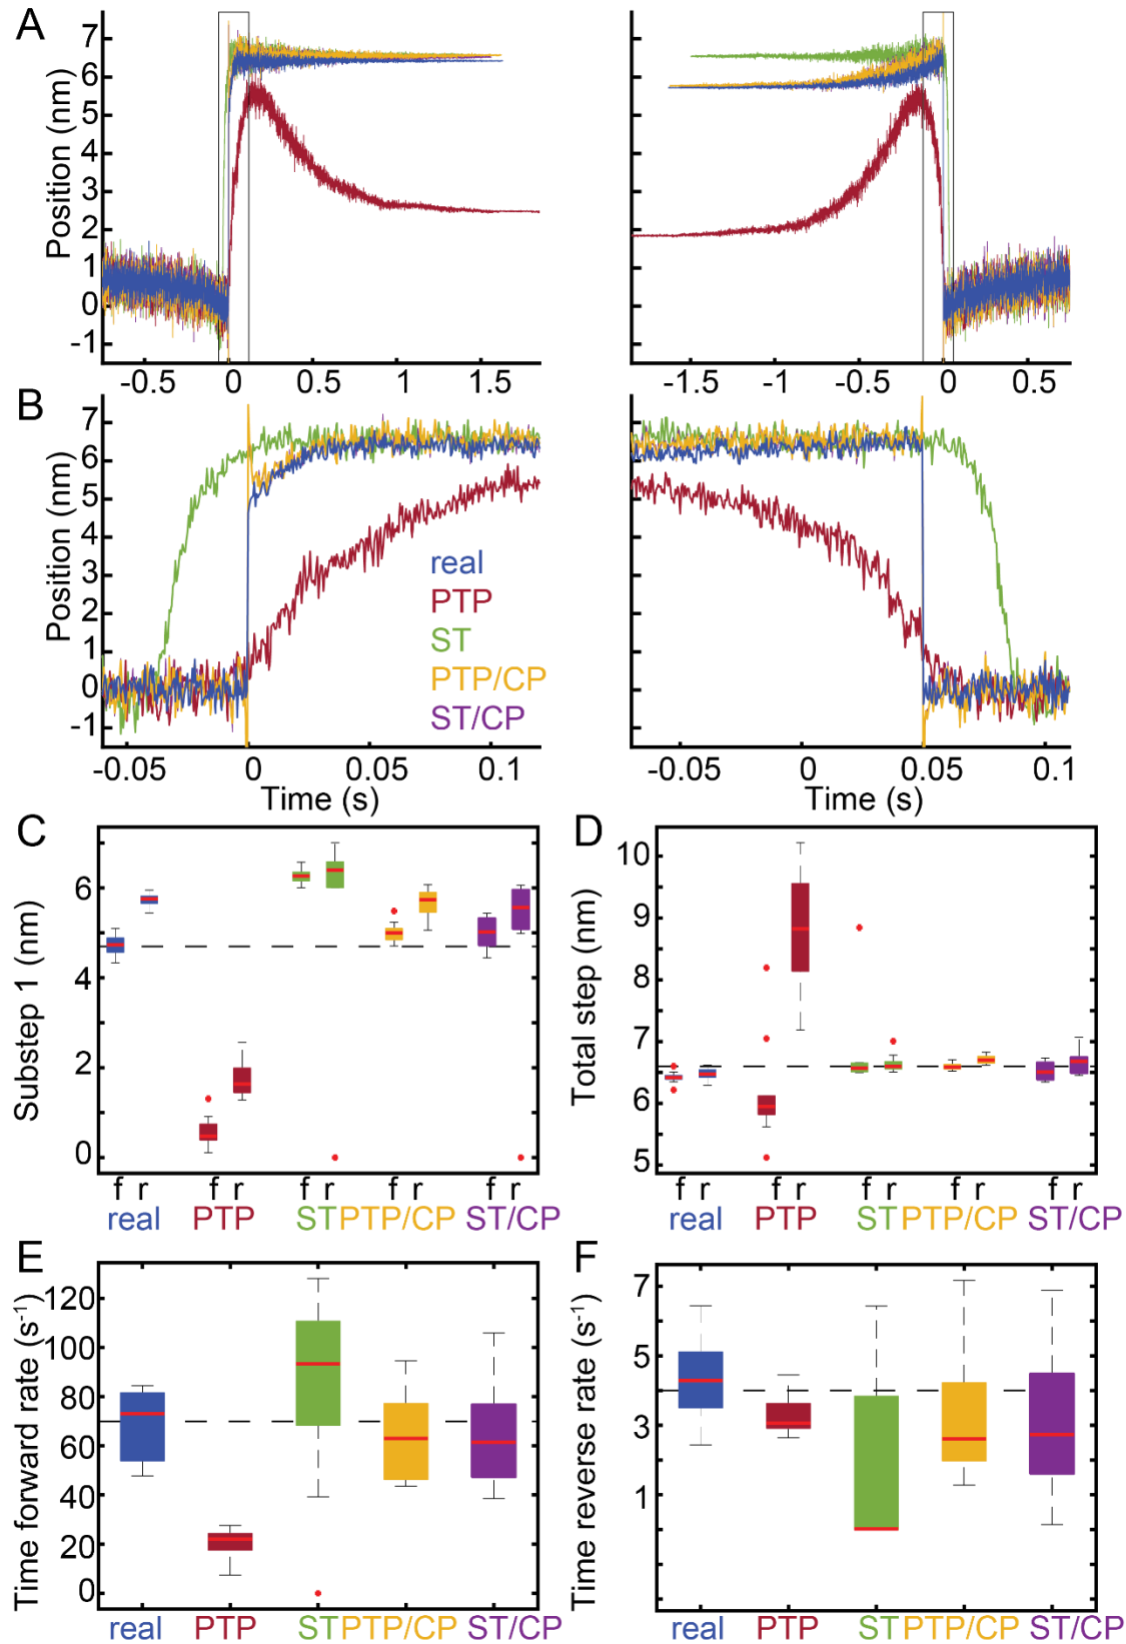

965

966 **Figure 6**

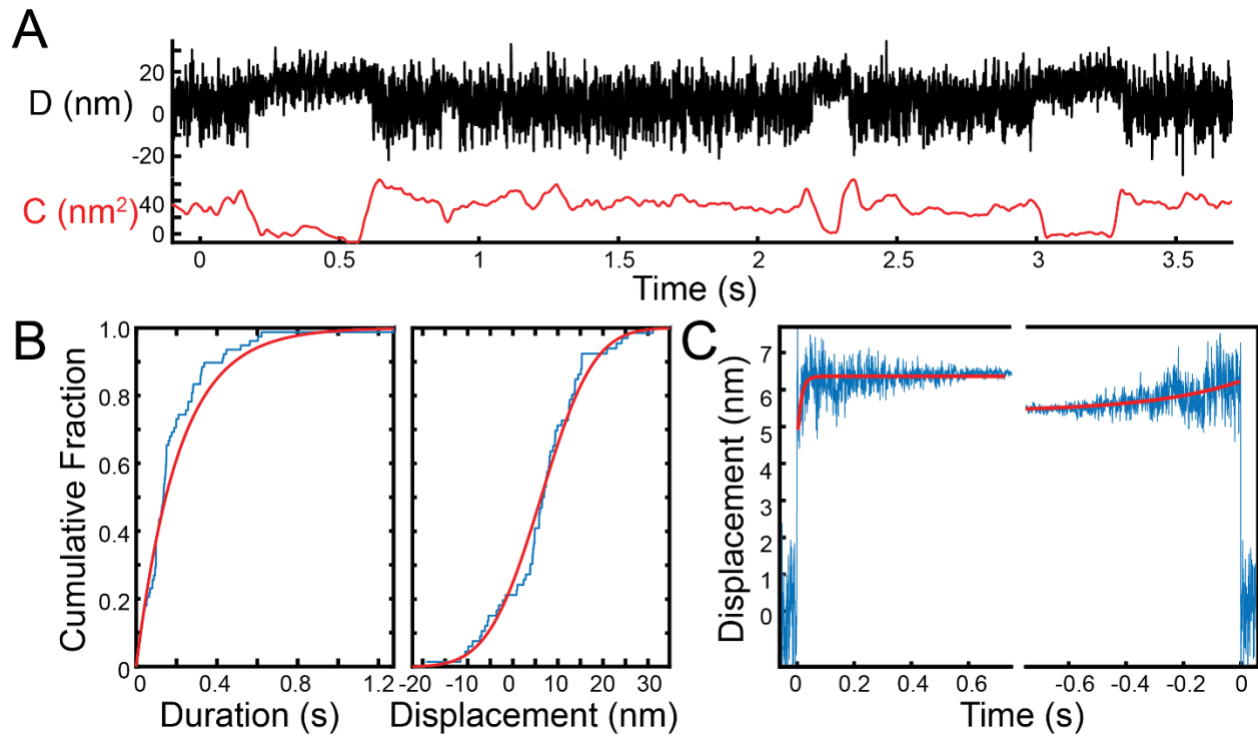

967

968 **Table 1**  
969

| <b>Method</b>           | <b>Average # of correctly detected interactions (mean <math>\pm</math> SD)</b> | <b>Average # of missed interactions (mean <math>\pm</math> SD)</b> | <b># of false positive interactions / 100 seconds (mean <math>\pm</math> SD)</b> |
|-------------------------|--------------------------------------------------------------------------------|--------------------------------------------------------------------|----------------------------------------------------------------------------------|
| <b>Single threshold</b> | 80 $\pm$ 4                                                                     | 20 $\pm$ 4                                                         | 4 $\pm$ 1                                                                        |
| <b>Peak-to-peak</b>     | 65 $\pm$ 5                                                                     | 36 $\pm$ 5                                                         | 0                                                                                |

970

971 **Table 2**  
972

| <b>Method</b>                 | <b>Error in binding initiation times (ms, mean with 95% CI)</b> | <b>Error in binding termination times (ms, mean with 95% CI)</b> |
|-------------------------------|-----------------------------------------------------------------|------------------------------------------------------------------|
| <b>Single threshold</b>       | 28.2 (+13.8, -21.7)                                             | -28.6 (+19.1, -11.9)                                             |
| <b>Peak-to-peak</b>           | -55.5 (+69.0, -195.5)                                           | 50.4 (+188.1, -64.9)                                             |
| <b>Change point algorithm</b> | 0.5 (+9.0, -5.5)                                                | 0.7 (+4.8, -4.2)                                                 |

973

974 **Table 3**

975

| <b>Time forward ensemble averages (mean with 95% CI)</b>  |                        |                                    |                                     |                                     |                                     |
|-----------------------------------------------------------|------------------------|------------------------------------|-------------------------------------|-------------------------------------|-------------------------------------|
| <b>Parameter</b>                                          | <b>real</b>            | <b>PTP</b>                         | <b>ST</b>                           | <b>PTP, CP</b>                      | <b>ST, CP</b>                       |
| <b>Substep 1 (nm)</b>                                     | 4.7<br>(+0.4, -0.4)    | 0.6<br>(+0.7, -0.5)<br>p < 0.001   | 6.3<br>(+0.3, -0.3)<br>p < 0.001    | 5.0<br>(+0.5, -0.3)<br>p = 0.021    | 5.0<br>(+0.4, -0.6)<br>p = 0.045    |
| <b>Substep 2 (nm)</b>                                     | 1.7<br>(+0.5, -0.4)    | 5.6<br>(+1.7, -0.8)<br>p < 0.001   | 0.5<br>(+1.7, -0.4)<br>p = 0.003    | 1.6<br>(+0.3, -0.4)<br>p = 0.427    | 1.5<br>(+0.5, -0.6)<br>p = 0.186    |
| <b>Total step (nm)</b>                                    | 6.4<br>(+0.2, -0.2)    | 6.2<br>(+2.0, -1.1)<br>p = 0.026   | 6.8<br>(+2.1, -0.3)<br>p = 0.002    | 6.6<br>(+0.1, -0.1)<br>p = 0.001    | 6.5<br>(+0.2, -0.2)<br>p = 0.186    |
| <b>Rate (s<sup>-1</sup>)</b>                              | 68.7<br>(+15.8, -20.9) | 20.2<br>(+7.4, -12.8)<br>p < 0.001 | 84.3<br>(+43.8, -84.3)<br>p = 0.141 | 64.5<br>(+30.0, -20.9)<br>p = 0.473 | 63.6<br>(+42.3, -25.0)<br>p = 0.241 |
| <b>Time reversed ensemble averages (mean with 95% CI)</b> |                        |                                    |                                     |                                     |                                     |
| <b>Parameter</b>                                          | <b>real</b>            | <b>PTP</b>                         | <b>ST</b>                           | <b>PTP, CP</b>                      | <b>ST, CP</b>                       |
| <b>Substep 1 (nm)</b>                                     | 5.7<br>(+0.2, -0.3)    | 1.7<br>(+0.8, -0.4)<br>p < 0.001   | 5.2<br>(+1.8, -5.2)<br>p = 0.026    | 5.7<br>(+0.4, -0.6)<br>p = 0.970    | 5.0<br>(+1.0, -5.0)<br>p = 0.385    |
| <b>Substep 2 (nm)</b>                                     | 0.7<br>(+0.2, -0.2)    | 7.1<br>(+1.7, -1.4)<br>p < 0.001   | 1.4<br>(+5.2, -1.4)<br>p = 0.038    | 1.0<br>(+0.5, -0.4)<br>p = 0.026    | 1.6<br>(+4.8, -1.1)<br>p = 0.045    |
| <b>Total step (nm)</b>                                    | 6.5<br>(+0.1, -0.2)    | 8.8<br>(+1.4, -1.6)<br>p < 0.001   | 6.6<br>(+0.4, -0.1)<br>p = 0.003    | 6.7<br>(+0.1, -0.1)<br>p < 0.001    | 6.7<br>(+0.4, -0.2)<br>p = 0.011    |
| <b>Rate (s<sup>-1</sup>)</b>                              | 4.3<br>(+2.2, -1.9)    | 3.3<br>(+1.2, -0.6)<br>p = 0.054   | 1.7<br>(+4.8 -1.7)<br>p = 0.038     | 3.3<br>(+3.9, -2.0)<br>p = 0.089    | 3.0<br>(+3.8, -2.9)<br>p = 0.076    |

976
